# Supplementary material for: Architecture and functions of a multipartite genome of the methylotrophic bacterium Paracoccus aminophilus JCM 7686, containing primary and secondary chromids
Source: PubMed Central journal article supplement (PMC3925955; doi:10.1186/1471-2164-15-124), 2014-02-12
Supplement: 1471-2164-15-124-S1.pdf [file 1471-2164-15-124-S1.pdf]

**TABLE S1.** COG categories of the proteins of *P. aminophilus* JCM 7686.

| Proteins predicted functions (COG categories)                          | Chromosome | pAMI1 | pAMI2 | pAMI3 | pAMI4 | pAMI5 | pAMI6 | pAMI7 | pAMI8 |
|------------------------------------------------------------------------|------------|-------|-------|-------|-------|-------|-------|-------|-------|
| <b>L:</b> DNA replication, recombination and repair                    | 126        | 4     | 7     | 2     | 17    | 5     | 2     | 5     | 37    |
| <b>K:</b> transcription                                                | 202        | 15    | 2     | 1     | 43    | 29    | 17    | 1     | 15    |
| <b>J:</b> translation, ribosomal structure and biogenesis              | 163        | 2     | 0     | 0     | 6     | 2     | 1     | 0     | 0     |
| <b>D:</b> cell division and chromosome partitioning                    | 21         | 1     | 1     | 0     | 2     | 1     | 1     | 1     | 3     |
| <b>O:</b> posttranslational modification, protein turnover, chaperones | 114        | 0     | 0     | 0     | 2     | 6     | 2     | 0     | 9     |
| <b>M:</b> cell envelope biogenesis, outer membrane                     | 139        | 2     | 0     | 0     | 10    | 5     | 2     | 0     | 3     |
| <b>N:</b> cell motility and secretion                                  | 24         | 0     | 0     | 0     | 0     | 4     | 0     | 0     | 1     |
| <b>V:</b> defense mechanisms                                           | 38         | 0     | 0     | 0     | 9     | 4     | 3     | 0     | 5     |
| <b>P:</b> inorganic ion transport and metabolism                       | 210        | 14    | 0     | 0     | 43    | 38    | 20    | 0     | 5     |
| <b>T:</b> signal transduction mechanisms                               | 89         | 4     | 0     | 0     | 6     | 14    | 7     | 0     | 8     |
| <b>U:</b> intracellular trafficking and secretion                      | 47         | 0     | 1     | 0     | 1     | 0     | 3     | 1     | 9     |
| <b>C:</b> energy production and conversion                             | 183        | 5     | 0     | 0     | 23    | 10    | 9     | 0     | 20    |
| <b>G:</b> carbohydrate transport and metabolism                        | 139        | 3     | 0     | 0     | 31    | 18    | 9     | 0     | 6     |
| <b>E:</b> amino acid transport and metabolism                          | 385        | 41    | 0     | 0     | 65    | 52    | 31    | 0     | 1     |
| <b>F:</b> nucleotide transport and metabolism                          | 75         | 2     | 0     | 0     | 4     | 3     | 5     | 0     | 0     |
| <b>H:</b> coenzyme metabolism                                          | 124        | 3     | 0     | 0     | 8     | 9     | 8     | 0     | 2     |
| <b>I:</b> lipid metabolism                                             | 105        | 5     | 0     | 0     | 19    | 14    | 10    | 0     | 2     |
| <b>Q:</b> secondary metabolite biosynthesis, transport and catabolism  | 82         | 10    | 0     | 0     | 17    | 8     | 4     | 0     | 0     |
| <b>R:</b> general function prediction only                             | 316        | 16    | 0     | 1     | 51    | 28    | 18    | 1     | 17    |
| function unknown (hypothetical protein)                                | 904        | 8     | 2     | 1     | 33    | 28    | 27    | 5     | 61    |
