# Supplementary material for: Architecture and functions of a multipartite genome of the methylotrophic bacterium Paracoccus aminophilus JCM 7686, containing primary and secondary chromids
Source: PubMed Central journal article supplement (PMC3925955; doi:10.1186/1471-2164-15-124), 2014-02-12
Supplement: 1471-2164-15-124-S3.pdf [file 1471-2164-15-124-S3.pdf]

**TABLE S2.** Two-component systems and histidine kinases encoded by the *P. aminophilus* JCM 7686 genome.

| Histidine kinase gene | Response regulator gene | Predicted function (based on the histidine kinase homology)                                      | Replicon   |
|-----------------------|-------------------------|--------------------------------------------------------------------------------------------------|------------|
| JCM7686_pAMI4p337     | JCM7686_pAMI4p336       | regulation of a high affinity potassium-uptake                                                   | pAMI4      |
| JCM7686_pAMI5p018     | JCM7686_pAMI5p019       | regulation of a trimethylamine N-oxide reductase respiratory system                              | pAMI5      |
| JCM7686_pAMI5p061     | JCM7686_pAMI5p060       | unknown                                                                                          | pAMI5      |
| JCM7686_pAMI5p082     | JCM7686_pAMI5p081       | unknown                                                                                          | pAMI5      |
| JCM7686_pAMI5p117     | JCM7686_pAMI5p118       | regulation of expression of virulence factors                                                    | pAMI5      |
| JCM7686_pAMI6p023     | JCM7686_pAMI6p024       | unknown                                                                                          | pAMI6      |
| JCM7686_pAMI6p041     | unknown                 | unknown                                                                                          | pAMI6      |
| JCM7686_pAMI8p124     | JCM7686_pAMI8p123       | unknown                                                                                          | pAMI8      |
| JCM7686_pAMI8p173     | JCM7686_pAMI8p174       | unknown                                                                                          | pAMI8      |
| JCM7686_0157          | JCM7686_0159            | unknown                                                                                          | chromosome |
| JCM7686_0575          | JCM7686_0576            | regulation of nitrogen assimilation                                                              | chromosome |
| JCM7686_0577          | JCM7686_0578            | regulation of nitrogen assimilation                                                              | chromosome |
| JCM7686_0947          | unknown                 | unknown                                                                                          | chromosome |
| JCM7686_1133          | JCM7686_1132            | unknown                                                                                          | chromosome |
| JCM7686_1281          | JCM7686_1282            | regulation of chemotaxis                                                                         | chromosome |
| JCM7686_1314          | unknown                 | unknown                                                                                          | chromosome |
| JCM7686_1371          | JCM7686_1372            | unknown                                                                                          | chromosome |
| JCM7686_1819          | JCM7686_1818            | unknown                                                                                          | chromosome |
| JCM7686_1927          | JCM7686_1926            | unknown                                                                                          | chromosome |
| JCM7686_2063          | unknown                 | regulation of phosphate homeostasis                                                              | chromosome |
| JCM7686_2280          | JCM7686_2279            | unknown                                                                                          | chromosome |
| JCM7686_2539          | unknown                 | regulation of differentiation and cell cycle progression                                         | chromosome |
| JCM7686_2824          | JCM7686_2823            | regulation of C4-dicarboxylate metabolism                                                        | chromosome |
| JCM7686_2960          | unknown                 | unknown                                                                                          | chromosome |
| JCM7686_3261          | JCM7686_3260            | unknown                                                                                          | chromosome |
| JCM7686_3369          | JCM7686_3370            | regulation of expression of virulence factors                                                    | chromosome |
| JCM7686_3383          | JCM7686_3385            | regulation of methanol and formaldehyde oxidation                                                | chromosome |
| JCM7686_3423          | JCM7686_3425            | regulation of several anaerobic processes and assimilation of CO <sub>2</sub> and N <sub>2</sub> | chromosome |
| JCM7686_3465          | JCM7686_3468            | unknown                                                                                          | chromosome |
