# Supplementary material for: Architecture and functions of a multipartite genome of the methylotrophic bacterium Paracoccus aminophilus JCM 7686, containing primary and secondary chromids
Source: PubMed Central journal article supplement (PMC3925955; doi:10.1186/1471-2164-15-124), 2014-02-12
Supplement: 1471-2164-15-124-S4.pdf [file 1471-2164-15-124-S4.pdf]

**TABLE S3.** Toxin-antitoxin systems encoded by the *P. aminophilus* JCM 7686 genome.

| Toxin gene         | Toxin family | Antitoxin gene    | Antitoxin family | Replicon   |
|--------------------|--------------|-------------------|------------------|------------|
| JCM7686_pAMI2p005  | RelE/ParE    | JCM7686_pAMI2p006 | HTH_XRE          | pAMI2      |
| JCM7686_pAMI3p001  | RelE/ParE    | JCM7686_pAMI3p002 | ParD             | pAMI3      |
| JCM7686_pAMI4p367  | Doc          | JCM7686_pAMI4p368 | Phd              | pAMI4      |
| JCM7686_pAMI5p1216 | VapC         | JCM7686_pAMI5p215 | Phd              | pAMI5      |
| JCM7686_pAMI6p005  | CcdB         | JCM7686_pAMI6p006 | CcdA             | pAMI6      |
| JCM7686_pAMI7p005  | RelE/ParE    | JCM7686_pAMI7p004 | ParD             | pAMI7      |
| JCM7686_pAMI8p005  | RelE/ParE    | JCM7686_pAMI8p006 | ParD             | pAMI8      |
| JCM7686_pAMI8p048  | VapC         | JCM7686_pAMI8p049 | Phd              | pAMI8      |
| JCM7686_pAMI8p076  | RelE/ParE    | JCM7686_pAMI8p075 | ParD             | pAMI8      |
| JCM7686_pAMI8p106  | HipA         | JCM7686_pAMI8p105 | HipB             | pAMI8      |
| JCM7686_1676       | HipA         | JCM7686_1677      | HipB             | chromosome |
