# Supplementary material for: Architecture and functions of a multipartite genome of the methylotrophic bacterium Paracoccus aminophilus JCM 7686, containing primary and secondary chromids
Source: PubMed Central journal article supplement (PMC3925955; doi:10.1186/1471-2164-15-124), 2014-02-12
Supplement: 1471-2164-15-124-S5.pdf [file 1471-2164-15-124-S5.pdf]

**TABLE S4.** Chaperones and co-chaperonins encoded by the *P. aminophilus* JCM 7686 genome.

| Chaperone gene    | Homologous protein | Description                                                                  | Replicon   |
|-------------------|--------------------|------------------------------------------------------------------------------|------------|
| JCM7686_pAMI4p204 | GroEL/Hsp60        | major molecular chaperone                                                    | pAMI4      |
| JCM7686_pAMI5p111 | HslJ               | heat shock protein                                                           | pAMI5      |
| JCM7686_pAMI5p166 | DnaK/Hsp70         | major molecular chaperone                                                    | pAMI5      |
| JCM7686_pAMI6p154 | ClpB-like          | ATP-dependent Clp protease ATP-binding subunit                               | pAMI6      |
| JCM7686_0077      | GrpE               | heat shock protein                                                           | chromosome |
| JCM7686_0087      | ClpP               | protease                                                                     | chromosome |
| JCM7686_0138      | ClpB               | ATP-dependent Clp protease ATP-binding subunit                               | chromosome |
| JCM7686_0295      | Lon                | protease                                                                     | chromosome |
| JCM7686_0479      | FtsH               | protease                                                                     | chromosome |
| JCM7686_0482      | HtpX               | heat shock protein, Zn-dependent protease with chaperone function            | chromosome |
| JCM7686_0582      | Hfq                | RNA chaperone                                                                | chromosome |
| JCM7686_0769      | CspB               | cold shock protein, RNA chaperone                                            | chromosome |
| JCM7686_0997      | CspA               | cold shock protein, RNA chaperone                                            | chromosome |
| JCM7686_1064      | MoxR               | MoxR-like ATPase                                                             | chromosome |
| JCM7686_1081      | DnaJ-like          | DnaJ-class molecular chaperone                                               | chromosome |
| JCM7686_1391      | DegP/HtrA          | protease, protein quality control in the periplasm of Gram-negative bacteria | chromosome |
| JCM7686_1409      | Lon                | protease                                                                     | chromosome |
| JCM7686_1579      | ClpX               | ATPase with chaperone activity                                               | chromosome |
| JCM7686_1580      | ClpP               | protease                                                                     | chromosome |
| JCM7686_1874      | OmpH               | outer membrane chaperone Skp (OmpH)                                          | chromosome |
| JCM7686_1935      | GroES/Hsp10        | co-chaperonin                                                                | chromosome |
| JCM7686_1936      | GroEL/Hsp60        | major molecular chaperone                                                    | chromosome |
| JCM7686_1980      | DnaJ-like          | DnaJ-class molecular chaperone                                               | chromosome |
| JCM7686_2155      | ClpA               | ATPase with chaperone activity                                               | chromosome |
| JCM7686_2353      | IbpA               | molecular chaperone                                                          | chromosome |
| JCM7686_2458      | CsaA               | export-related chaperone                                                     | chromosome |
| JCM7686_2465      | Hsp20              | small heat shock protein                                                     | chromosome |
| JCM7686_2697      | DnaJ-like          | DnaJ-class molecular chaperone                                               | chromosome |
| JCM7686_2977      | HslO/Hsp33         | disulfide bond chaperones of the HSP33 family                                | chromosome |
| JCM7686_3036      | DnaK/Hsp70         | major molecular chaperone                                                    | chromosome |
| JCM7686_3037      | DnaJ               | major molecular chaperone                                                    | chromosome |
| JCM7686_3176      | ATP12              | chaperone required for the assembly of the mitochondrial F1-ATPase           | chromosome |
| JCM7686_3428      | SecB               | protein-export chaperone                                                     | chromosome |
| JCM7686_3434      | HslU/ClpQ          | ATP-dependent protease ATP-binding subunit                                   | chromosome |
| JCM7686_3436      | HslV/ClpY          | ATP-dependent HslUV protease                                                 | chromosome |
