# Supplementary material for: Architecture and functions of a multipartite genome of the methylotrophic bacterium Paracoccus aminophilus JCM 7686, containing primary and secondary chromids
Source: PubMed Central journal article supplement (PMC3925955; doi:10.1186/1471-2164-15-124), 2014-02-12
Supplement: 1471-2164-15-124-S6.pdf [file 1471-2164-15-124-S6.pdf]

**TABLE S5.** Genes encoding DNA repair related proteins within the *P. aminophilus* JCM 7686 genome.

| Gene                              | Genes in <i>E. coli</i> * | Genes in <i>C. crescentus</i> **         | Description                                                                                   | Replicon            |
|-----------------------------------|---------------------------|------------------------------------------|-----------------------------------------------------------------------------------------------|---------------------|
| <b>Base excision repair</b>       |                           |                                          |                                                                                               |                     |
| JCM7686_2055                      | <i>alkA</i>               | CC_2201                                  | 3-methyl-adenine DNA glycosylase II                                                           | chromosome          |
| JCM7686_0666                      | <i>fpg (mutM)</i>         | CC_3707                                  | formamidopyrimidine DNA glycosylase                                                           | chromosome          |
| JCM7686_3073                      | <i>mutY</i>               | CC_0377                                  | adenine glycosylase                                                                           | chromosome          |
| JCM7686_0624                      | <i>nth</i>                | CC_2272<br>CC_3731                       | endonuclease III; specific for apurinic and/or apyrimidinic sites                             | chromosome          |
| JCM7686_0517                      | <i>tag</i>                | CC_0382                                  | 3-methyl-adenine DNA glycosylase I                                                            | chromosome          |
| JCM7686_0757<br>JCM7686_pAMI4p331 | <i>ung (udg)</i>          | CC_1333<br>CC_1549<br>CC_2084<br>CC_2333 | uracil-DNA glycosylase                                                                        | chromosome<br>pAMI4 |
| JCM7686_2891<br>JCM7686_3402      | <i>xthA</i>               | CC_2011<br>CC_3706                       | exodeoxyribonuclease III                                                                      | chromosome          |
| <b>Nucleotide excision repair</b> |                           |                                          |                                                                                               |                     |
| JCM7686_2156                      | <i>mfd</i>                | CC_1844                                  | transcription-repair coupling factor                                                          | chromosome          |
| JCM7686_2515                      | <i>uvrA</i>               | CC_2590                                  | DNA damage recognition protein                                                                | chromosome          |
| JCM7686_2310                      | <i>uvrB</i>               | CC_2981                                  | DNA damage binding protein                                                                    | chromosome          |
| JCM7686_3046                      | <i>uvrC</i>               | CC_2881                                  | excision nuclease                                                                             | chromosome          |
| JCM7686_0943                      | <i>uvrD</i>               | CC_1528                                  | DNA-dependent ATPase I and helicase II                                                        | chromosome          |
| <b>Mismatch repair</b>            |                           |                                          |                                                                                               |                     |
| JCM7686_3269                      | <i>mutL</i>               | CC_0695                                  | DNA mismatch repair protein                                                                   | chromosome          |
| JCM7686_3143                      | <i>mutS</i>               | CC_0012                                  | DNA mismatch repair protein                                                                   | chromosome          |
| <b>Direct repair</b>              |                           |                                          |                                                                                               |                     |
| JCM7686_0623<br>JCM7686_pAMI5p076 | <i>ada</i>                | CC_0709<br>CC_3729                       | O6-methylguanine-DNA methyltransferase; transcription activator/repressor enzyme              | chromosome<br>pAMI5 |
| JCM7686_pAMI5p075                 | <i>alkB</i>               | CC_0009                                  | 1-methyladenine and 3-methylcytosine repair protein                                           | pAMI5               |
| JCM7686_2048                      | absent                    | CC_1330                                  | DNA repair photolyase (SplB-like)                                                             | chromosome          |
| JCM7686_2677                      | <i>ogt</i>                | CC_0659<br>CC_0689                       | O-6-alkylguanine-DNA/cysteine-protein methyltransferase                                       | chromosome          |
| <b>Recombinational repair</b>     |                           |                                          |                                                                                               |                     |
| JCM7686_3439                      | absent                    | CC_3538                                  | ATP-dependent helicase/nuclease (AddA)                                                        | chromosome          |
| JCM7686_3440                      | absent                    | CC_3537                                  | ATP-dependent nuclease (AddB)                                                                 | chromosome          |
| JCM7686_2060                      | <i>radA</i>               | CC_1660                                  | DNA repair protein                                                                            | chromosome          |
| JCM7686_2538                      | <i>recA</i>               | CC_1087                                  | DNA strand exchange and renaturation, DNA-dependent ATPase, DNA- and ATP-dependent coprotease | chromosome          |
| JCM7686_0660                      | <i>recF</i>               | CC_0159                                  | DNA replication and repair protein                                                            | chromosome          |
| JCM7686_2217                      | <i>recG</i>               | CC_1437                                  | DNA helicase, resolution of Holliday junctions, branch migration                              | chromosome          |
| JCM7686_1078                      | <i>recJ</i>               | CC_1386                                  | single-stranded-DNA-specific (5'→3') exonuclease                                              | chromosome          |
| JCM7686_0693                      | <i>recN</i>               | CC_1983                                  | recombination and repair protein                                                              | chromosome          |
| JCM7686_0658                      | <i>recO</i>               | CC_1564                                  | recombinational repair protein                                                                | chromosome          |
| JCM7686_0328                      | <i>recQ</i>               | CC_3465                                  | ATP-dependent DNA helicase                                                                    | chromosome          |
| JCM7686_1942                      | <i>recR</i>               | CC_0269                                  | recombination and repair protein                                                              | chromosome          |

|                                                                        |                                 |                                                                                                                       |                                                        |                     |
|------------------------------------------------------------------------|---------------------------------|-----------------------------------------------------------------------------------------------------------------------|--------------------------------------------------------|---------------------|
| JCM7686_0483                                                           | <i>ruvA</i>                     | CC_3237                                                                                                               | Holliday junction helicase subunit A; branch migration | chromosome          |
| JCM7686_0481                                                           | <i>ruvB</i>                     | CC_1283<br>CC_3236                                                                                                    | Holliday junction helicase subunit B; branch migration | chromosome          |
| JCM7686_0484                                                           | <i>ruvC</i>                     | CC_3238                                                                                                               | Holliday junction nuclease; resolution of structures   | chromosome          |
| JCM7686_0280                                                           | <i>sbcB</i>                     | absent                                                                                                                | exodeoxyribonuclease I                                 | chromosome          |
| JCM7686_2161<br>JCM7686_pAMI8p047                                      | <i>ssb</i>                      | CC_1468                                                                                                               | ssDNA-binding protein                                  | Chromosome<br>pAMI8 |
| <b>Other repair related proteins</b>                                   |                                 |                                                                                                                       |                                                        |                     |
| JCM7686_1991<br>JCM7686_2612<br>JCM7686_2906                           | <i>dinB</i><br>( <i>polIV</i> ) | CC_2466                                                                                                               | polymerase IV (damage-inducible protein B)             | chromosome          |
| JCM7686_1318<br>JCM7686_1972<br>JCM7686_pAMI8p132<br>JCM7686_pAMI8p203 | <i>dnaE</i>                     | CC_1926<br>CC_3211                                                                                                    | subunit alpha of DNA polymerase III                    | chromosome<br>pAMI8 |
| JCM7686_2872                                                           | <i>dut</i>                      | CC_3713                                                                                                               | dUTPase                                                | chromosome          |
| JCM7686_0753                                                           | <i>lexA</i>                     | CC_1902                                                                                                               | regulator for SOS regulon                              | chromosome          |
| JCM7686_2218                                                           | <i>ligA</i>                     | CC_1522                                                                                                               | DNA ligase NAD-dependent                               | chromosome          |
| JCM7686_pAMI4p364                                                      | absent                          | CC_3610                                                                                                               | DNA ligase ATP-dependent                               | pAMI4               |
| JCM7686_pAMI4p365                                                      | <i>lhr</i>                      | CC_2040                                                                                                               | Lhr-like helicases                                     | pAMI4               |
| JCM7686_0135<br>JCM7686_2983<br>JCM7686_2998<br>JCM7686_pAMI5p033      | <i>mutT</i>                     | CC_0266<br>CC_0407<br>CC_0418<br>CC_0833<br>CC_1126<br>CC_1346<br>CC_1554<br>CC_2652<br>CC_3382<br>CC_3440<br>CC_3650 | mutT/NUDIX family hydrolase                            | chromosome<br>pAMI5 |
| JCM7686_3038<br>JCM7686_pAMI8p117                                      | <i>radC</i>                     | CC_2680<br>CC_2744                                                                                                    | DNA repair protein                                     | chromosome<br>pAMI8 |
| JCM7686_pAMI8p201                                                      | absent                          | CC_3213                                                                                                               | ImuA repair protein                                    | pAMI8               |
| JCM7686_1973<br>JCM7686_pAMI8p202                                      | absent                          | CC_3212                                                                                                               | ImuB, Y-family DNA polymerase                          | chromosome<br>pAMI8 |

\* representative of *Gammaproteobacteria*

\*\* representative of *Alphaproteobacteria*
