# Supplementary material for: Architecture and functions of a multipartite genome of the methylotrophic bacterium Paracoccus aminophilus JCM 7686, containing primary and secondary chromids
Source: PubMed Central journal article supplement (PMC3925955; doi:10.1186/1471-2164-15-124), 2014-02-12
Supplement: 1471-2164-15-124-S7.pdf [file 1471-2164-15-124-S7.pdf]

M HinfI MboI ND

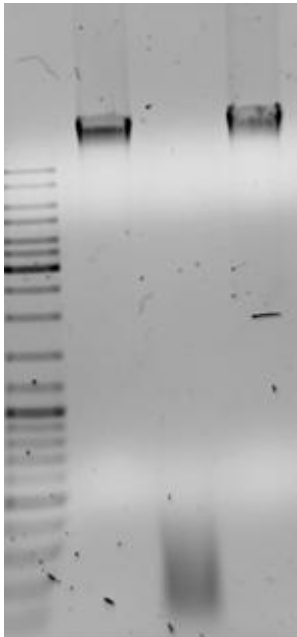

**HinfI** – recognizes and cleaves the sequence 5'-GATC-3'

**MboI** – recognizes and cleaves the sequence 5'-GATC-3'

For the analysis also other restriction endonucleases were used.

Inability to cleave GATC sequences within *P. aminophilus* JCM 7686 genomic DNA shows that the sequences were methylated (and therefore protected) by CcrM methylase. Analogous analysis was performed with the cloned JCM7685\_3079 gene in an *in vitro* experiment.
