# Supplementary material for: Architecture and functions of a multipartite genome of the methylotrophic bacterium Paracoccus aminophilus JCM 7686, containing primary and secondary chromids
Source: PubMed Central journal article supplement (PMC3925955; doi:10.1186/1471-2164-15-124), 2014-02-12
Supplement: 1471-2164-15-124-S8.pdf [file 1471-2164-15-124-S8.pdf]

**TABLE S6.** Summary of the sensitivity of various restriction endonucleases to DNA modifications introduced by the JCM7686\_0772 and JCM7686\_2655 proteins (m<sup>5</sup>C MTases).

| REase           | Recognition site | Sensitivity to m <sup>5</sup> C | Number of sites in pET28_JCM7686_0772 | Number of sites in pET28_JCM7686_2655 | Cleavage |
|-----------------|------------------|---------------------------------|---------------------------------------|---------------------------------------|----------|
| <b>AluI</b>     | AGCT             | S                               | 29                                    | 29                                    | P, L     |
| <b>BglI</b>     | GCcNNNNNGGC      | S                               | 3                                     | 3                                     | P, L     |
| <b>Bme1390I</b> | CCNGG            | U                               | 32                                    | 31                                    | P        |
| <b>BsuRI</b>    | GGCC             | S                               | 51                                    | 52                                    | P, L     |
| <b>CaiI</b>     | CAGNNNCTG        | S                               | 4                                     | 4                                     | P, L     |
| <b>EcoO109I</b> | RGGNCCY          | S                               | 4                                     | 5                                     | P        |
| <b>EcoRII</b>   | CCWGG            | S                               | 12                                    | 12                                    | P, L     |
| <b>Hin6I</b>    | GCGC             | S                               | 84                                    | 91                                    | P        |
| <b>HpaII</b>    | CCGG             | S                               | 43                                    | 44                                    | P        |
| <b>HpyF10VI</b> | GCNNNNNNNGC      | S                               | 80                                    | 80                                    | P        |
| <b>MspI</b>     | CcGG             | S                               | 43                                    | 44                                    | P        |
| <b>NciI</b>     | CCSGG            | S                               | 20                                    | 19                                    | P, L     |
| <b>Paul</b>     | GCGCGC           | U                               | 8                                     | 10                                    | P        |
| <b>PvuII</b>    | CAGCTG           | S                               | 4                                     | 6                                     | P, L     |
| <b>TaiI</b>     | ACGT             | S                               | 16                                    | 17                                    | P        |
| <b>XhoI</b>     | CTCGAG           | U                               | 3                                     | 2                                     | P, L     |
| <b>Bsh1236I</b> | CGCG             | S                               | 75                                    | 72                                    | Y        |
| <b>Bsp68I</b>   | TCGCGA           | U                               | 3                                     | 3                                     | Y        |
| <b>Bsp143I</b>  | GATC             | S                               | 40                                    | 43                                    | Y        |
| <b>BspLI</b>    | GGNNCC           | S                               | 31                                    | 32                                    | Y        |
| <b>Eco130I</b>  | CCWWGG           | U                               | 6                                     | 6                                     | Y        |
| <b>FspBI</b>    | CTAG             | U                               | 7                                     | 7                                     | Y        |
| <b>Hin1II</b>   | CATG             | U                               | 41                                    | 41                                    | Y        |
| <b>Hinfl</b>    | GANTC            | S                               | 20                                    | 21                                    | Y        |
| <b>MbiI</b>     | CCGCTC           | S                               | 7                                     | 6                                     | Y        |
| <b>MluI</b>     | ACGCGT           | S                               | 1                                     | 1                                     | Y        |
| <b>NcoI</b>     | CCATGG           | S                               | 3                                     | 2                                     | Y        |
| <b>PamDI</b>    | CCATGG           | S                               | 3                                     | 2                                     | Y        |

Y – complete cleavage; P – partial digestion; L – partial plasmid cleavage; S – sensitive to m<sup>5</sup>C; U – unknown sensitivity to m<sup>5</sup>C; **C** – the enzyme will not cleave if the **marked** cytosine is methylated; c – the enzyme is not sensitive to methylation of the marked cytosine; C – there are no data on the sensitivity of the enzyme to methylation of the unmarked cytosine.
