# Supplementary material for: Architecture and functions of a multipartite genome of the methylotrophic bacterium Paracoccus aminophilus JCM 7686, containing primary and secondary chromids
Source: PubMed Central journal article supplement (PMC3925955; doi:10.1186/1471-2164-15-124), 2014-02-12
Supplement: 1471-2164-15-124-S9.pdf [file 1471-2164-15-124-S9.pdf]

**TABLE S7.** Summary of the sensitivity of various restriction endonucleases to DNA modifications introduced by the JCM7686\_0815 protein (m<sup>4</sup>C MTase).

| REase         | Recognition site | Sensitivity to m <sup>4</sup> C | Number of sites in pET30_JCM7686_0815 | Cleavage |
|---------------|------------------|---------------------------------|---------------------------------------|----------|
| <b>CfrI</b>   | YGGCCR           | U                               | 5                                     | P, L     |
| <b>HaeIII</b> | GGCC             | S                               | 26                                    | P*       |
| <b>Hin6I</b>  | GCGC             | U                               | 53                                    | Y        |
| <b>HpaII</b>  | CCGG             | S                               | 34                                    | Y        |
| <b>MspI</b>   | CcGG             | S                               | 34                                    | Y        |

\* the larger fused DNA fragments were observed only in case of incomplete cleavage of BsuRI sites that overlapped CfrI target sequences (YGGCCR).

Y – complete cleavage; P – partial digestion; L – partial plasmid cleavage; S – sensitive to m<sup>4</sup>C; U – unknown sensitivity to m<sup>4</sup>C; **C** – the enzyme will not cleave if the **marked** cytosine is methylated; **c** – the enzyme is not sensitive to methylation of the marked cytosine; **C** – there are no data on the sensitivity of the enzyme to methylation of the unmarked cytosine.
