# Supplementary material for: Architecture and functions of a multipartite genome of the methylotrophic bacterium Paracoccus aminophilus JCM 7686, containing primary and secondary chromids
Source: PubMed Central journal article supplement (PMC3925955; doi:10.1186/1471-2164-15-124), 2014-02-12
Supplement: 1471-2164-15-124-S10.pdf [file 1471-2164-15-124-S10.pdf]

**TABLE S8.** Summary of the sensitivity of various restriction endonucleases to DNA modifications introduced by the JCM7686\_1231, JCM7686\_2255 and JCM7686\_2934 proteins (m<sup>6</sup>A MTases).

| REase  | Recognition site | Sensitivity to m <sup>6</sup> A | Number of sites in pET28_JCM7686_2934 | Number of sites in pET28_JCM7686_2255 | Number of sites in pET28_JCM7686_1231 | Cleavage |
|--------|------------------|---------------------------------|---------------------------------------|---------------------------------------|---------------------------------------|----------|
| Hinfl  | GANTC            | S                               | 19                                    | 19                                    | 18                                    | N        |
| AluI   | AGCT             | S                               | 25                                    | 25                                    | 22                                    | Y        |
| CseI   | GACGC            | S                               | 14                                    | 14                                    | 13                                    | Y        |
| NlaIII | CATG             | U                               | 32                                    | 32                                    | 30                                    | Y        |
| TaiI   | ACGT             | S                               | 14                                    | 14                                    | 14                                    | Y        |
| TasI   | AATT             | U                               | 23                                    | 23                                    | 21                                    | Y        |
| Tru1I  | TTAA             | U                               | 25                                    | 25                                    | 25                                    | Y        |

Y – complete cleavage; N – no digestion; S – sensitive to m<sup>6</sup>A; U – unknown sensitivity to m<sup>6</sup>A; **A** – the enzyme will not cleave if the **marked** adenine is methylated; A – there are no data on the sensitivity of the enzyme to methylation of the unmarked adenine.
