# Supplementary material for: Architecture and functions of a multipartite genome of the methylotrophic bacterium Paracoccus aminophilus JCM 7686, containing primary and secondary chromids
Source: PubMed Central journal article supplement (PMC3925955; doi:10.1186/1471-2164-15-124), 2014-02-12
Supplement: 1471-2164-15-124-S14.pdf [file 1471-2164-15-124-S14.pdf]

**TABLE S9.** Host ranges of *P. aminophilus* JCM 7686 pAMI1-8 replicons.

| Host \ Plasmid                          | pAMI1 | pAMI2 | pAMI3 | pAMI4 | pAMI5 | pAMI6 | pAMI7 | pAMI8 |
|-----------------------------------------|-------|-------|-------|-------|-------|-------|-------|-------|
| <b>Alphaproteobacteria</b>              |       |       |       |       |       |       |       |       |
| <i>Agrobacterium tumefaciens</i> LBA288 | +     | +     | +     | +     | +     | +     | +     | +     |
| <i>Ochrobactrum</i> sp. LM19R           | +     | +     | +     | +     | -     | -     | +     | +     |
| <i>Paracoccus versutus</i> UW225        | +     | +     | +     | +     | +     | +     | +     | +     |
| <i>Paracoccus pantotrophus</i> KL100    | +     | +     | +     | +     | +     | +     | +     | +     |
| <i>Rhizobium etli</i> CE3               | +     | +     | +     | +     | +     | +     | +     | +     |
| <i>Sinorhizobium</i> sp. LM 21R         | +     | +     | +     | +     | -     | -     | +     | +     |
| <b>Betaproteobacteria</b>               |       |       |       |       |       |       |       |       |
| <i>Alcaligenes</i> sp. LM16R            | -     | -     | -     | -     | -     | -     | -     | -     |
| <b>Gammaproteobacteria</b>              |       |       |       |       |       |       |       |       |
| <i>Escherichia coli</i> BR825           | -     | -     | -     | -     | -     | -     | -     | -     |

- unable to replicate

+ able to replicate
