# Supplementary material for: Architecture and functions of a multipartite genome of the methylotrophic bacterium Paracoccus aminophilus JCM 7686, containing primary and secondary chromids
Source: PubMed Central journal article supplement (PMC3925955; doi:10.1186/1471-2164-15-124), 2014-02-12
Supplement: 1471-2164-15-124-S17.pdf [file 1471-2164-15-124-S17.pdf]

**TABLE S10.** Transposase genes within the *P. aminophilus* JCM 7686 genome.

| Transposase gene  | Truncated/c complete | IS name/<br>Tn name | IS family<br>(IS group)/<br>Tn family | IS length/<br>Tn length | Insertion site of complete TEs                                       | Replicon |
|-------------------|----------------------|---------------------|---------------------------------------|-------------------------|----------------------------------------------------------------------|----------|
| JCM7686_pAMI1p053 | complete             | Tn3434a             | Tn3                                   | 3695                    | putrescine transport system permease ( <i>potB</i> ) gene            | pAMI1    |
| JCM7686_pAMI2p013 | complete             | ISPam3              | IS3 (IS407)                           | 1197                    | gene encoding hypothetical protein                                   | pAMI2    |
| JCM7686_pAMI2p014 | complete             |                     |                                       |                         |                                                                      |          |
| JCM7686_pAMI2p018 | complete             | ISPam4              | IS5 (IS427)                           | 865                     | intergenic region                                                    | pAMI2    |
| JCM7686_pAMI2p019 | complete             |                     |                                       |                         |                                                                      |          |
| JCM7686_pAMI4p209 | complete             | ISPam1              | IS5 (IS903)                           | 1050                    | intergenic region                                                    | pAMI4    |
| JCM7686_pAMI4p225 | complete             | ISPam5              | IS3 (IS407)                           | 1197                    | intergenic region                                                    | pAMI4    |
| JCM7686_pAMI4p226 | complete             |                     |                                       |                         |                                                                      |          |
| JCM7686_pAMI4p304 | truncated            | N/A                 | IS1182                                | N/A                     | N/A                                                                  | pAMI4    |
| JCM7686_pAMI4p305 | truncated            | N/A                 | IS21                                  | N/A                     | N/A                                                                  | pAMI4    |
| JCM7686_pAMI4p306 | complete             | ISPam5              | IS3 (IS407)                           | 1197                    | intergenic region                                                    | pAMI4    |
| JCM7686_pAMI4p307 | complete             |                     |                                       |                         |                                                                      |          |
| JCM7686_pAMI4p333 | truncated            | N/A                 | IS5 (IS427)                           | N/A                     | N/A                                                                  | pAMI4    |
| JCM7686_pAMI4p334 | complete             | ISPam5              | IS3 (IS407)                           | 1197                    | transposase gene                                                     | pAMI4    |
| JCM7686_pAMI4p335 | complete             |                     |                                       |                         |                                                                      |          |
| JCM7686_pAMI4p348 | truncated            | N/A                 | IS3 (IS150)                           | N/A                     | N/A                                                                  | pAMI4    |
| JCM7686_pAMI4p349 | truncated            | N/A                 | IS3 (IS150)                           | N/A                     | N/A                                                                  | pAMI4    |
| JCM7686_pAMI4p350 | truncated            | N/A                 | IS3 (IS150)                           | N/A                     | N/A                                                                  | pAMI4    |
| JCM7686_pAMI4p353 | truncated            | N/A                 | IS5 (IS903)                           | N/A                     | N/A                                                                  | pAMI4    |
| JCM7686_pAMI4p354 | truncated            | N/A                 | IS5 (IS903)                           | N/A                     | N/A                                                                  | pAMI4    |
| JCM7686_pAMI4p357 | truncated            | N/A                 | IS256                                 | N/A                     | N/A                                                                  | pAMI4    |
| JCM7686_pAMI4p358 | truncated            | N/A                 | IS3 (IS51)                            | N/A                     | N/A                                                                  | pAMI4    |
| JCM7686_pAMI4p359 | complete             | ISPam5              | IS3 (IS407)                           | 1197                    | transposase gene                                                     | pAMI4    |
| JCM7686_pAMI4p360 | complete             |                     |                                       |                         |                                                                      |          |
| JCM7686_pAMI4p361 | complete             | ISPam6              | IS1182                                | 1657                    | intergenic region                                                    | pAMI4    |
| JCM7686_pAMI5p071 | truncated            | N/A                 | IS5 (IS903)                           | N/A                     | N/A                                                                  | pAMI5    |
| JCM7686_pAMI5p092 | complete             | ISPam2              | IS5 (IS903)                           | 1054                    | ABC-type nitrate/sulfonate/bicarbonate transport system, ATPase gene | pAMI5    |
| JCM7686_pAMI5p247 | truncated            | N/A                 | IS3 (IS407)                           | N/A                     | N/A                                                                  | pAMI5    |
| JCM7686_pAMI5p248 | truncated            | N/A                 | IS3 (IS407)                           | N/A                     | N/A                                                                  | pAMI5    |
| JCM7686_pAMI7p010 | complete             | Tn3434a             | Tn3                                   | 3695                    | gene encoding hypothetical protein                                   | pAMI7    |
| JCM7686_pAMI8p011 | complete             | ISPam2              | IS5 (IS903)                           | 1054                    | DNA/RNA helicase (superfamily II, SNF2 family) gene                  | pAMI8    |
| JCM7686_pAMI8p022 | complete             | ISPam7              | IS3 (IS407)                           | 1271                    | intergenic region                                                    | pAMI8    |
| JCM7686_pAMI8p023 |                      |                     |                                       |                         |                                                                      |          |
| JCM7686_pAMI8p024 | truncated            | N/A                 | ISL3                                  | N/A                     | N/A                                                                  | pAMI8    |

|                                        |                          |                |             |      |                                                           |            |
|----------------------------------------|--------------------------|----------------|-------------|------|-----------------------------------------------------------|------------|
| JCM7686_pAMI8p025<br>JCM7686_pAMI8p026 | complete<br>(frameshift) | <i>ISPam8</i>  | IS66        | 2669 | transposase gene                                          | pAMI8      |
| JCM7686_pAMI8p090                      | complete                 | N/A            | IS3 (IS150) | N/A  | N/A                                                       | pAMI8      |
| JCM7686_pAMI8p091                      | truncated                |                |             |      |                                                           |            |
| JCM7686_pAMI8p167                      | complete                 | <i>Tn3434a</i> | Tn3         | 3695 | Na(+)-translocating NADH-quinone reductase subunit C gene | pAMI8      |
| JCM7686_pAMI8p168                      | complete                 | <i>ISPam1</i>  | IS5 (IS903) | 1050 | intergenic region                                         | pAMI8      |
| JCM7686_pAMI8p175                      | truncated                | N/A            | IS21        | N/A  | N/A                                                       | pAMI8      |
| JCM7686_pAMI8p176                      | truncated                | N/A            | IS21        | N/A  | N/A                                                       | pAMI8      |
| JCM7686_pAMI8p183                      | complete                 | <i>Tn3434a</i> | Tn3         | 3695 | sodium/glutamate symporter gene                           | pAMI8      |
| JCM7686_pAMI8p196                      | truncated                | N/A            | IS481       | N/A  | N/A                                                       | pAMI8      |
| JCM7686_pAMI8p197                      | complete                 | <i>ISPam9</i>  | IS110       | N/A* | transposase gene                                          | pAMI8      |
| JCM7686_pAMI8p198                      | truncated                | N/A            | IS3 (IS51)  | N/A  | N/A                                                       | pAMI8      |
| JCM7686_pAMI8p199                      | complete                 | <i>ISPam10</i> | IS5 (IS903) | 1054 | transposase gene                                          | pAMI8      |
| JCM7686_0276                           | complete                 | <i>ISPam5</i>  | IS3 (IS407) | 1197 | transposase gene                                          | chromosome |
| JCM7686_0277                           | complete                 |                |             |      |                                                           |            |
| JCM7686_0278                           | truncated                | N/A            | IS3 (IS407) | N/A  | N/A                                                       | chromosome |
| JCM7686_0279                           | truncated                | N/A            | IS3 (IS407) | N/A  | N/A                                                       | chromosome |
| JCM7686_0292                           | complete                 | <i>ISPam5</i>  | IS3 (IS407) | 1197 | gene encoding hypothetical protein                        | chromosome |
| JCM7686_0293                           | complete                 |                |             |      |                                                           |            |
| JCM7686_1270                           | truncated                | N/A            | IS3 (IS51)  | N/A  | N/A                                                       | chromosome |
| JCM7686_1274                           | truncated                | N/A            | IS66        | N/A  | N/A                                                       | chromosome |
| JCM7686_1275                           | truncated                |                |             |      |                                                           |            |
| JCM7686_1679                           | truncated                | N/A            | IS66        | N/A  | N/A                                                       | chromosome |
| JCM7686_1868                           | truncated                | N/A            | IS3 (IS407) | N/A  | N/A                                                       | chromosome |
| JCM7686_1869                           | truncated                |                |             |      |                                                           |            |
| JCM7686_2162                           | complete                 | <i>ISPam5</i>  | IS3 (IS407) | 1197 | intergenic region                                         | chromosome |
| JCM7686_2163                           | complete                 |                |             |      |                                                           |            |
| JCM7686_2224                           | truncated                | N/A            | IS3 (IS407) | N/A  | N/A                                                       | chromosome |
| JCM7686_2225                           | truncated                |                |             |      |                                                           |            |
| JCM7686_2291                           | complete                 | N/A            | Mu-type     | N/A  | N/A                                                       | chromosome |
| JCM7686_2292                           | complete                 |                |             |      |                                                           |            |
| JCM7686_2296                           | complete                 | <i>ISPam11</i> | IS3 (IS51)  | 1219 | transposase gene                                          | chromosome |
| JCM7686_2297                           | complete                 |                |             |      |                                                           |            |
| JCM7686_2298                           | truncated                | N/A            | IS5 (IS427) | N/A  | N/A                                                       | chromosome |
| JCM7686_2387                           | complete                 | <i>ISPam5</i>  | IS3 (IS407) | 1197 | intergenic region                                         | chromosome |
| JCM7686_2388                           | complete                 |                |             |      |                                                           |            |
| JCM7686_2390                           | truncated                | N/A            | IS21        | N/A  | N/A                                                       | chromosome |
| JCM7686_2391                           | truncated                |                |             |      |                                                           |            |

\* Since ISs of the IS110 family do not have IRs, and do not generate DRs, it is not possible to determine the length of *ISPam9*.
