# Supplementary material for: Architecture and functions of a multipartite genome of the methylotrophic bacterium Paracoccus aminophilus JCM 7686, containing primary and secondary chromids
Source: PubMed Central journal article supplement (PMC3925955; doi:10.1186/1471-2164-15-124), 2014-02-12
Supplement: 1471-2164-15-124-S18.pdf [file 1471-2164-15-124-S18.pdf]

**Table S11.** Bacterial strains used in this study.

| Strain                                  | Characteristics                                                                                                                                                                                                | Reference             |
|-----------------------------------------|----------------------------------------------------------------------------------------------------------------------------------------------------------------------------------------------------------------|-----------------------|
| <i>Agrobacterium tumefaciens</i> LBA288 | Rif <sup>r</sup>                                                                                                                                                                                               | [1]                   |
| <i>Alcaligenes</i> sp. LM16R            | Rif <sup>r</sup> derivative of wild-type strain LM16                                                                                                                                                           | [2]                   |
| <i>Escherichia coli</i> BR825           | <i>polA::Tn10 trp</i>                                                                                                                                                                                          | [3]                   |
| <i>E. coli</i> ER2566                   | F <sup>-</sup> $\lambda$ <i>fhuA2 (lon) ompT lacZ::T7 geneI gal sulA11 <math>\Delta</math>(mcrC mrr)114::IS10 R(mcr-73::mini-Tn10)2 R(zgb-210::Tn10)1 (Tet<sup>s</sup>) endA1 (Dcm)</i>                        | Laboratory collection |
| <i>E. coli</i> TG1                      | F <sup>+</sup> [ <i>traD36 proAB<sup>+</sup> lacI<sup>f</sup> lacZ<math>\Delta</math>M15</i> ] <i>supE thi-1 <math>\Delta</math>(lac-proAB) <math>\Delta</math>(mcrB-hsdSM)5, (r<sub>K</sub>m<sub>K</sub>)</i> | Laboratory collection |
| <i>Ochrobactrum</i> sp. LM19R           | Rif <sup>r</sup> derivative of wild-type strain LM19                                                                                                                                                           | [2]                   |
| <i>Paracoccus aminophilus</i> JCM 7686  | wild type                                                                                                                                                                                                      | [4]                   |
| <i>P. aminophilus</i> JCM 7686R         | Rif <sup>r</sup> derivative of wild-type strain JCM 7686                                                                                                                                                       | [5]                   |
| <i>P. aminophilus</i> AMI1              | pAMI1-less derivative of the strain JCM 7686R                                                                                                                                                                  | This work             |
| <i>P. aminophilus</i> AMI4              | pAMI4-less derivative of the strain JCM 7686R                                                                                                                                                                  | This work             |
| <i>P. aminophilus</i> AMI6              | pAMI6-less derivative of the strain JCM 7686R                                                                                                                                                                  | This work             |
| <i>P. aminophilus</i> AMI8              | pAMI8-less derivative of the strain JCM 7686R                                                                                                                                                                  | This work             |
| <i>P. aminophilus</i> AMI68             | pAMI6-less and pAMI8-less derivative of the strain JCM 7686R                                                                                                                                                   | This work             |
| <i>Paracoccus pantotrophus</i> KL100    | Rif <sup>r</sup> derivative of wild-type strain DSM 11073                                                                                                                                                      | [6]                   |
| <i>Paracoccus versutus</i> UW225        | Rif <sup>r</sup> derivative of wild-type strain UW1                                                                                                                                                            | [7]                   |
| <i>Rhizobium etli</i> CE3               | Str <sup>r</sup>                                                                                                                                                                                               | [8]                   |
| <i>Sinorhizobium</i> sp. LM 21R         | Rif <sup>r</sup> derivative of wild-type strain LM21                                                                                                                                                           | [2]                   |

## References

1. Hooykaas PJ, den Dulk-Ras H, Schilperoort RA: **Molecular mechanism of Ti plasmid mobilization by R plasmids: isolation of Ti plasmids with transposon-insertions in *Agrobacterium tumefaciens*.** *Plasmid* 1980, **4**:64-75.
2. Dziewit L, Adamczuk M, Szuplewska M, Bartosik D: **DIY series of genetic cassettes useful in construction of versatile vectors specific for Alphaproteobacteria.** *J Microbiol Methods* 2011, **86**(2):166-174.
3. Ludtke DN, Eichorn BG, Austin SJ: **Plasmid-partition functions of the P7 prophage.** *J Mol Biol* 1989, **209**(3):393-406.
4. Urakami T, Araki H, Oyanagi H, Suzuki K, Komagata K: ***Paracoccus aminophilus* sp. nov. and *Paracoccus aminovorans* sp. nov., which utilize N,N-dimethylformamide.** *Int J Syst Bacteriol* 1990, **40**(3):287-291.
5. Dziewit L, Dmowski M, Baj J, Bartosik D: **Plasmid pAMI2 of *Paracoccus aminophilus* JCM 7686 carries N,N-dimethylformamide degradation-related genes whose expression is activated by a LuxR family regulator.** *Appl Environ Microbiol* 2010, **76**(6):1861-1869.
6. Bartosik D, Baj J, Bartosik AA, Wlodarczyk M: **Characterization of the replicator region of megaplasmid pTAV3 of *Paracoccus versutus* and search for plasmid-encoded traits.** *Microbiology (Reading, England)* 2002, **148**(Pt 3):871-881.
7. Bartosik D, Baj J, Plasota M, Piechucka E, Wlodarczyk M: **Analysis of *Thiobacillus versutus* pTAV1 plasmid functions.** *Acta Microbiol Pol* 1993, **39**:5-11.
8. Noel KD, Sanchez A, Fernandez L, Leemans J, Cevallos MA: ***Rhizobium phaseoli* symbiotic mutants with transposon Tn5 insertions.** *J Bacteriol* 1984, **158**(1):148-155.
