# Supplementary material for: Architecture and functions of a multipartite genome of the methylotrophic bacterium Paracoccus aminophilus JCM 7686, containing primary and secondary chromids
Source: PubMed Central journal article supplement (PMC3925955; doi:10.1186/1471-2164-15-124), 2014-02-12
Supplement: 1471-2164-15-124-S19.pdf [file 1471-2164-15-124-S19.pdf]

**Table S12.** Plasmids used and constructed in this study.

| Plasmid            | Characteristics                                                                                                                                                                                                         | Reference |
|--------------------|-------------------------------------------------------------------------------------------------------------------------------------------------------------------------------------------------------------------------|-----------|
| pABW1              | Km <sup>r</sup> ; <i>ori</i> pMB1; mobilizable cloning vector; <i>oriT</i> RK2                                                                                                                                          | [1]       |
| pABW1-AMI1         | Km <sup>r</sup> ; <i>ori</i> pMB1; pABW1 derivative carrying 6.8-kb BamHI restriction fragment of pAMI1 (contains REP and PAR modules)                                                                                  | This work |
| pABW1-AMI4         | Km <sup>r</sup> ; <i>ori</i> pMB1; pABW1 derivative carrying 5.6-kb Sall/KpnI restriction fragment of pAMI4 (contains REP module)                                                                                       | This work |
| pABW1-AMI5         | Km <sup>r</sup> ; <i>ori</i> pMB1; pABW1 derivative carrying 4.0-kb DNA region (contains REP and PAR modules) of pAMI5 (amplified by PCR with primers LAMI5 and RAMI5) inserted between XbaI and SphI sites             | This work |
| pABW1-AMI6         | Km <sup>r</sup> ; <i>ori</i> pMB1; pABW1 derivative carrying 1.9-kb DNA region (contains REP module) of pAMI6 (amplified by PCR with primers LAMI6 and RAMI62) inserted between XbaI and SphI sites                     | This work |
| pABW1-AMI8         | Km <sup>r</sup> ; <i>ori</i> pMB1; pABW1 derivative carrying 4.3-kb DNA region (contains REP and PAR modules) of pAMI8 (amplified by PCR with primers LAMI8 and RAMI8) inserted into EcoRI site                         | This work |
| pBBR1MCS-2         | Km <sup>r</sup> ; <i>ori</i> pBBR1; broad-host-range cloning vector; mobilizable cloning vector, <i>oriT</i> RK2                                                                                                        | [2]       |
| pBBR-CcrM          | Km <sup>r</sup> ; <i>ori</i> pBBR1; pBBR1MCS-2 derivative carrying 1.4-kb DNA region (contains JCM7686_3079 gene) amplified by PCR with primers FCCRMXB and RCCRMXH and inserted between XbaI and XhoI sites            | This work |
| pET28_JCM7686_1231 | Km <sup>r</sup> ; <i>ori</i> pMB1; pET-28a derivative carrying 0.6-kb DNA region (contains JCM7686_1231 gene) amplified by PCR with primers JCM7686_1231F and JCM7686_1231R and inserted between NdeI and Sall sites    | This work |
| pET28_JCM7686_2255 | Km <sup>r</sup> ; <i>ori</i> pMB1; pET-28a derivative carrying 0.6-kb DNA region (contains JCM7686_2255 gene) amplified by PCR with primers JCM7686_2255F and JCM7686_2255R                                             | This work |
| pET28_JCM7686_2655 | Km <sup>r</sup> ; <i>ori</i> pMB1; pET-28a derivative carrying 2.1-kb DNA region (contains JCM7686_2655 gene) amplified by PCR with primers JCM7686_2655F and JCM7686_2655R and inserted between NheI and HindIII sites | This work |
| pET28_JCM7686_2934 | Km <sup>r</sup> ; <i>ori</i> pMB1; pET-28a derivative carrying 0.6-kb DNA region (contains JCM7686_2934 gene) amplified by PCR with primers JCM7686_2934F and JCM7686_2934R and inserted between NcoI and Sall sites    | This work |
| pET28_JCM7686_0772 | Km <sup>r</sup> ; <i>ori</i> pMB1; pET-28a derivative carrying 2.1-kb DNA region (contains JCM7686_0772 gene) amplified by PCR with primers JCM7686_0772F and JCM7686_0772R and inserted between NheI and HindIII sites | This work |
| pET-28a            | Km <sup>r</sup> ; <i>ori</i> pMB1; expression vector with T7lac promoter                                                                                                                                                | Novagen   |
| pET30_JCM7686_3079 | Km <sup>r</sup> ; <i>ori</i> pMB1; pET-30a derivative carrying 1.2-kb DNA region (contains JCM7686_3079 gene) amplified by PCR with primers JCM7686_3079F and JCM7686_3079R and inserted between NdeI and XhoI sites    | This work |
| pET30_JCM7686_0815 | Km <sup>r</sup> ; <i>ori</i> pMB1; pET-30a derivative carrying 0.5-kb DNA region (contains JCM7686_0815 gene) amplified by PCR with primers JCM7686_0815F and JCM7686_0815R and inserted between NdeI and XhoI sites    | This work |
| pET-30a            | Km <sup>r</sup> ; <i>ori</i> pMB1; expression vector with T7lac promoter                                                                                                                                                | Novagen   |
| pRK2013            | Km <sup>r</sup> ; helper plasmid carrying genes for conjugal transfer of RK2                                                                                                                                            | [3]       |

## References

1. Bartosik D, Bialkowska A, Baj J, Włodarczyk M: **Construction of mobilizable cloning vectors derived from pBGS18 and their application for analysis of replicator region of a pTAV202 mini-derivative of *Paracoccus versutus* pTAV1 plasmid.** *Acta Microbiol Pol* 1997, **46**(4):387-392.
2. Kovach ME, Phillips RW, Elzer PH, Roop RM, 2nd, Peterson KM: **pBBR1MCS: a broad-host-range cloning vector.** *BioTechniques* 1994, **16**(5):800-802.
3. Ditta G, Stanfield S, Corbin D, Helinski DR: **Broad host range DNA cloning system for gram-negative bacteria: construction of a gene bank of *Rhizobium meliloti*.** *Proc Natl Acad Sci USA* 1980, **77**(12):7347-7351.
