# Supplementary material for: Architecture and functions of a multipartite genome of the methylotrophic bacterium Paracoccus aminophilus JCM 7686, containing primary and secondary chromids
Source: PubMed Central journal article supplement (PMC3925955; doi:10.1186/1471-2164-15-124), 2014-02-12
Supplement: 1471-2164-15-124-S20.pdf [file 1471-2164-15-124-S20.pdf]

**Table S13.** Oligonucleotide primers used in this study.

| Primer        | Sequence (5'->3')                    | Function                                       |
|---------------|--------------------------------------|------------------------------------------------|
| JCM7686_0772F | GTTGCTAGCATGACCTATCAGCCGCACCTGCC     | amplification of JCM7686_0772                  |
| JCM7686_0772R | GTTAAGCTTTACCCAACCCTCCTGTCTTCCTTGATG | amplification of JCM7686_0772                  |
| JCM7686_1231F | GTTTCATATGGGTAAGCGATCGAATTTCC        | amplification of JCM7686_1231                  |
| JCM7686_1231R | GTTTCAGTCGACTGCCGCTGCCCTCCCGAAG      | amplification of JCM7686_1231                  |
| JCM7686_2255F | CAGCGTCGTATTGGCGGGCTATC              | amplification of JCM7686_2255                  |
| JCM7686_2255R | GACCGAGAGCGGAATCGTCATG               | amplification of JCM7686_2255                  |
| JCM7686_2655F | GTTGCTAGCATGACCTATCAACCGCACCTGCC     | amplification of JCM7686_2655                  |
| JCM7686_2655R | GTTAAGCTTTACCCAACCCTCCTGTTTTCTC      | amplification of JCM7686_2655                  |
| JCM7686_2934F | GTTCCATGGGTAAGCGATCGAATTTCC          | amplification of JCM7686_2934                  |
| JCM7686_2934R | GTTGTCGACTGCCGCGGCCCTCCCGATAAATTC    | amplification of JCM7686_2934                  |
| JCM7686_0815F | GTTTCATATGAGCGAACTCCTGTGCTCGATG      | amplification of JCM7686_0815                  |
| JCM7686_0815R | GTTTTACTCGAGTCGGGTGGCCTCCGGCTTCATG   | amplification of JCM7686_0815                  |
| JCM7686_3079F | GTTTCAT ATGAGGCAGAGCAAATGAAAACA      | amplification of JCM7686_3079                  |
| JCM7686_3079R | GTTTCACTCGAG GTTCGGGCGCTGTGCGCCGTCG  | amplification of JCM7686_3079                  |
| FCCRMXB       | GATCTAGAAAAGTGTTCGCGCAGACTC          | amplification of JCM7686_3079                  |
| RCCRMXH       | TACTCGAGCGGCGAAACGAATGGATCAG         | amplification of JCM7686_3079                  |
| LAMI5         | GCTCTAGATGGCGCAAGAAGATCGAAGG         | amplification of a replication module of pAMI5 |
| RAMI5         | TAGCATGCGCGAAGCGGATTAACCATCG         | amplification of a replication module of pAMI5 |
| LAMI6         | GACTCTAGAATCCGCTTCGGTCTTCTGG         | amplification of a replication module of pAMI6 |
| RAMI62        | TAGCATGCGCGTTCTGCGAGATCCTGTC         | amplification of a replication module of pAMI6 |
| LAMI8         | AGACCTGCAGGACTTCCAAGTAAAGCAG         | amplification of a replication module of pAMI8 |
| RAMI8         | CGAGAATCCACAGAAGCAGCTTGATCATG        | amplification of a replication module of pAMI8 |
